# Supplementary material for: Distribution and Molecular Identification of Culex pipiens and Culex tritaeniorhynchus as Potential Vectors of Rift Valley Fever Virus in Jazan, Saudi Arabia
Source: MDPI journal article supplement (doi:10.3390/pathogens10101334), 2021-10-15
Supplement: s1 [file s1]

## Supplementary Data

**Table S1. Best fit model selection for *C. pipiens* using Maximum Likelihood fits of 24 different nucleotide substitution models.**

| Model    | #Param | BIC     | AICc   | lnL     | I    | G    | R    | Freq A | Freq T | Freq C | Freq G | A=>T | A=>C | A=>G | T=>A | T=>C | T=>G | C=>A | C=>T | C=>G | G=>A | G=>T | G=>C |
|----------|--------|---------|--------|---------|------|------|------|--------|--------|--------|--------|------|------|------|------|------|------|------|------|------|------|------|------|
| T92      | 57     | 2672.2* | 2224.9 | -1055.3 | n/a  | n/a  | 1.50 | 0.34   | 0.34   | 0.16   | 0.16   | 0.06 | 0.03 | 0.1  | 0.06 | 0.1  | 0.03 | 0.06 | 0.22 | 0.03 | 0.22 | 0.06 | 0.03 |
| T92+G    | 58     | 2674.8  | 2219.6 | -1051.6 | n/a  | 0.05 | 1.56 | 0.34   | 0.34   | 0.16   | 0.16   | 0.06 | 0.03 | 0.1  | 0.06 | 0.1  | 0.03 | 0.06 | 0.22 | 0.03 | 0.22 | 0.06 | 0.03 |
| T92+I    | 58     | 2678.9  | 2223.7 | -1053.7 | 0.48 | n/a  | 1.52 | 0.34   | 0.34   | 0.16   | 0.16   | 0.06 | 0.03 | 0.1  | 0.06 | 0.1  | 0.03 | 0.06 | 0.22 | 0.03 | 0.22 | 0.06 | 0.03 |
| HKY      | 59     | 2682.7  | 2219.6 | -1050.6 | n/a  | n/a  | 1.50 | 0.29   | 0.40   | 0.15   | 0.16   | 0.07 | 0.03 | 0.1  | 0.05 | 0.09 | 0.03 | 0.05 | 0.26 | 0.03 | 0.18 | 0.07 | 0.03 |
| T92+G+I  | 59     | 2683.4  | 2220.3 | -1051.0 | 0.76 | 0.59 | 1.61 | 0.34   | 0.34   | 0.16   | 0.16   | 0.06 | 0.03 | 0.1  | 0.06 | 0.1  | 0.03 | 0.06 | 0.22 | 0.03 | 0.22 | 0.06 | 0.03 |
| HKY+G    | 60     | 2684.8  | 2213.9 | -1046.8 | n/a  | 0.05 | 1.58 | 0.29   | 0.40   | 0.15   | 0.16   | 0.07 | 0.03 | 0.11 | 0.05 | 0.09 | 0.03 | 0.05 | 0.26 | 0.03 | 0.19 | 0.07 | 0.03 |
| HKY+I    | 60     | 2689.0  | 2218.1 | -1048.8 | 0.48 | n/a  | 1.52 | 0.29   | 0.40   | 0.15   | 0.16   | 0.07 | 0.03 | 0.11 | 0.05 | 0.09 | 0.03 | 0.05 | 0.26 | 0.03 | 0.18 | 0.07 | 0.03 |
| TN93     | 60     | 2691.1  | 2220.2 | -1049.9 | n/a  | n/a  | 1.50 | 0.29   | 0.40   | 0.15   | 0.16   | 0.07 | 0.03 | 0.14 | 0.05 | 0.07 | 0.03 | 0.05 | 0.18 | 0.03 | 0.25 | 0.07 | 0.03 |
| HKY+G+I  | 61     | 2693.2  | 2214.4 | -1046.0 | 0.77 | 0.58 | 1.65 | 0.29   | 0.40   | 0.15   | 0.16   | 0.07 | 0.03 | 0.11 | 0.05 | 0.1  | 0.03 | 0.05 | 0.26 | 0.03 | 0.19 | 0.07 | 0.03 |
| TN93+G   | 61     | 2693.5  | 2214.7 | -1046.2 | n/a  | 0.05 | 1.56 | 0.29   | 0.40   | 0.15   | 0.16   | 0.07 | 0.03 | 0.14 | 0.05 | 0.07 | 0.03 | 0.05 | 0.19 | 0.03 | 0.25 | 0.07 | 0.03 |
| TN93+I   | 61     | 2697.6  | 2218.9 | -1048.2 | 0.48 | n/a  | 1.52 | 0.29   | 0.40   | 0.15   | 0.16   | 0.07 | 0.03 | 0.14 | 0.05 | 0.07 | 0.03 | 0.05 | 0.18 | 0.03 | 0.25 | 0.07 | 0.03 |
| TN93+G+I | 62     | 2702.0  | 2215.4 | -1045.5 | 0.76 | 0.58 | 1.62 | 0.29   | 0.40   | 0.15   | 0.16   | 0.07 | 0.03 | 0.14 | 0.05 | 0.07 | 0.03 | 0.05 | 0.2  | 0.03 | 0.25 | 0.07 | 0.03 |
| GTR      | 63     | 2716.6  | 2222.2 | -1047.9 | n/a  | n/a  | 0.95 | 0.29   | 0.40   | 0.15   | 0.16   | 0.15 | 0.02 | 0.1  | 0.11 | 0.07 | 0.02 | 0.03 | 0.2  | 0.02 | 0.18 | 0.06 | 0.02 |
| GTR+G    | 64     | 2719.1  | 2216.8 | -1044.2 | n/a  | 0.05 | 1.00 | 0.29   | 0.40   | 0.15   | 0.16   | 0.15 | 0.02 | 0.1  | 0.11 | 0.08 | 0.02 | 0.03 | 0.21 | 0.02 | 0.18 | 0.06 | 0.02 |
| GTR+I    | 64     | 2723.1  | 2220.9 | -1046.2 | 0.48 | n/a  | 0.96 | 0.29   | 0.40   | 0.15   | 0.16   | 0.15 | 0.02 | 0.1  | 0.11 | 0.07 | 0.02 | 0.03 | 0.2  | 0.02 | 0.18 | 0.06 | 0.02 |
| GTR+G+I  | 65     | 2727.1  | 2217.0 | -1043.3 | 0.75 | 0.65 | 1.05 | 0.29   | 0.40   | 0.15   | 0.16   | 0.15 | 0.02 | 0.1  | 0.11 | 0.08 | 0.02 | 0.04 | 0.22 | 0.02 | 0.18 | 0.05 | 0.02 |
| JC       | 55     | 2763.8  | 2332.1 | -1110.9 | n/a  | n/a  | 0.5  | 0.25   | 0.25   | 0.25   | 0.25   | 0.08 | 0.08 | 0.08 | 0.08 | 0.08 | 0.08 | 0.08 | 0.08 | 0.08 | 0.08 | 0.08 | 0.08 |
| K2       | 56     | 2765.5  | 2326.0 | -1106.8 | n/a  | n/a  | 1.50 | 0.25   | 0.25   | 0.25   | 0.25   | 0.05 | 0.05 | 0.15 | 0.05 | 0.15 | 0.05 | 0.05 | 0.15 | 0.05 | 0.15 | 0.05 | 0.05 |
| JC+G     | 56     | 2766.7  | 2327.1 | -1107.4 | n/a  | 0.05 | 0.5  | 0.25   | 0.25   | 0.25   | 0.25   | 0.08 | 0.08 | 0.08 | 0.08 | 0.08 | 0.08 | 0.08 | 0.08 | 0.08 | 0.08 | 0.08 | 0.08 |
| K2+G     | 57     | 2769.0  | 2321.6 | -1103.6 | n/a  | 0.05 | 1.52 | 0.25   | 0.25   | 0.25   | 0.25   | 0.05 | 0.05 | 0.15 | 0.05 | 0.15 | 0.05 | 0.05 | 0.15 | 0.05 | 0.15 | 0.05 | 0.05 |
| JC+I     | 56     | 2769.5  | 2330.0 | -1108.8 | 0.48 | n/a  | 0.5  | 0.25   | 0.25   | 0.25   | 0.25   | 0.08 | 0.08 | 0.08 | 0.08 | 0.08 | 0.08 | 0.08 | 0.08 | 0.08 | 0.08 | 0.08 | 0.08 |
| K2+I     | 57     | 2771.9  | 2324.6 | -1105.1 | 0.48 | n/a  | 1.51 | 0.25   | 0.25   | 0.25   | 0.25   | 0.05 | 0.05 | 0.15 | 0.05 | 0.15 | 0.05 | 0.05 | 0.15 | 0.05 | 0.15 | 0.05 | 0.05 |

|        |    |        |        |         |      |      |      |      |      |      |      |      |      |      |      |      |      |      |      |      |      |      |
|--------|----|--------|--------|---------|------|------|------|------|------|------|------|------|------|------|------|------|------|------|------|------|------|------|
| JC+G+I | 57 | 2774.8 | 2327.5 | -1106.6 | 0.74 | 0.68 | 0.5  | 0.25 | 0.25 | 0.25 | 0.25 | 0.08 | 0.08 | 0.08 | 0.08 | 0.08 | 0.08 | 0.08 | 0.08 | 0.08 | 0.08 | 0.08 |
| K2+G+I | 58 | 2777.1 | 2321.9 | -1102.8 | 0.74 | 0.67 | 1.54 | 0.25 | 0.25 | 0.25 | 0.25 | 0.05 | 0.05 | 0.15 | 0.05 | 0.15 | 0.05 | 0.05 | 0.15 | 0.05 | 0.15 | 0.05 |

\* Substitution pattern was best depicted at the lowest BIC scores (Bayesian Information Criterion). A discrete Gamma distribution (+G) of 5 rate categories together with assumption of the presence of certain evolutionarily invariables (+I fraction of sites) were used to model the evolutionary rates non-uniformity among sites. This analysis involved 29 nucleotide sequences.

**Table S2 Estimates of Evolutionary Divergence between Sequences of *C. pipiens*.**

| Species 1                          | Species 2                            | Evolutionary distance | Geographical location |
|------------------------------------|--------------------------------------|-----------------------|-----------------------|
| <b><i>C. pipiens</i>/2B64-9.20</b> | <b><i>C. pipiens</i>/KCH9</b>        | <b>0.00919443</b>     | <b>Kenya</b>          |
| <i>C. pipiens</i> /2B64-9.20       | <i>C. pipiens</i> /NEH12             | 0.00919455            | Kenya                 |
| <i>C. pipiens</i> /2B64-9.20       | <i>C. pipiens</i> /NAH4              | 0.00919455            | Kenya                 |
| <i>C. pipiens</i> /2B64-9.20       | <i>C. pipiens</i> /Port-2168         | 0.00919455            | Portugal              |
| <i>C. pipiens</i> /2B64-9.20       | <i>C. pipiens</i> /S41               | 0.00919455            | Turkey                |
| <i>C. pipiens</i> /2B64-9.20       | <i>C. pipiens</i> /NCH10             | 0.01073658            | Kenya                 |
| <i>C. pipiens</i> /2B64-9.20       | <i>C. pipiens</i> /FCH8              | 0.01073658            | Kenya                 |
| <i>C. pipiens</i> /2B64-9.20       | <i>C. pipiens</i> /13-LCO1490-C05-08 | 0.01073658            | Botswana              |
| <i>C. pipiens</i> /2B64-9.20       | <i>C. pipiens</i> /NIH11             | 0.01074280            | Kenya                 |
| <i>C. pipiens</i> /2B64-9.20       | <i>C. pipiens</i> /Tunisian-isolate  | 0.01074286            | Tunisia               |
| <i>C. pipiens</i> /2B64-9.20       | <i>C. pipiens</i> /S16               | 0.01074299            | Turkey                |
| <i>C. pipiens</i> /2B64-9.20       | <i>C. pipiens</i> /S3                | 0.01074299            | Turkey                |
| <i>C. pipiens</i> /2B64-9.20       | <i>C. pipiens</i> /Isolate-6         | 0.01074299            | Germany               |
| <i>C. pipiens</i> /2B64-9.20       | <i>C. pipiens</i> /S67               | 0.01074299            | Turkey                |
| <i>C. pipiens</i> /2B64-9.20       | <i>C. pipiens</i> /S56               | 0.01074299            | Turkey                |
| <i>C. pipiens</i> /2B64-9.20       | <i>C. pipiens</i> /S43               | 0.01074299            | Turkey                |
| <i>C. pipiens</i> /2B64-9.20       | <i>C. pipiens</i> /S39               | 0.01074299            | Turkey                |
| <i>C. pipiens</i> /2B64-9.20       | <i>C. pipiens</i> /S36               | 0.01074299            | Turkey                |
| <i>C. pipiens</i> /2B64-9.20       | <i>C. pipiens</i> /S13               | 0.01074299            | Turkey                |
| <i>C. pipiens</i> /2B64-9.20       | <i>C. pipiens</i> /S28               | 0.01074299            | Turkey                |
| <i>C. pipiens</i> /2B64-9.20       | <i>C. pipiens</i> /wuzhishan         | 0.01074299            | China                 |
| <i>C. pipiens</i> /2B64-9.20       | <i>C. pipiens</i> /S11               | 0.01229692            | Turkey                |
| <i>C. pipiens</i> /2B64-9.20       | <i>C. pipiens</i> /MI149             | 0.01229692            | Australia             |
| <i>C. pipiens</i> /2B64-9.20       | <i>C. pipiens</i> /DZB5              | 0.01229712            | Hungary               |
| <i>C. pipiens</i> /2B64-9.20       | <i>C. pipiens</i> /DZA1              | 0.01229712            | Hungary               |
| <i>C. pipiens</i> /2B64-9.20       | <i>C. pipiens</i> /S68               | 0.01229712            | Turkey                |
| <i>C. pipiens</i> /2B64-9.20       | <i>C. pipiens</i> /S38               | 0.01229712            | Turkey                |

|                              |                        |            |        |
|------------------------------|------------------------|------------|--------|
| <i>C. pipiens</i> /2B64-9.20 | <i>C. pipiens</i> /S26 | 0.01383200 | Turkey |
|------------------------------|------------------------|------------|--------|

The number of base substitutions per site from between sequences are shown. Analyses were conducted using the Tamura 3-parameter model [24]. This analysis involved 29 nucleotide sequences. Every uncertain position was omitted for each sequence pair using the option of pairwise deletion. Evolutionary analyses were conducted in MEGA X [22].

**Table S3. Best fitting model selection for *C. tritaeniorhynchus* using Maximum Likelihood fits of 24 different nucleotide substitution models.**

| Model    | #Param | BIC      | AICc   | lnL    | I    | G     | R    | Freq A | Freq T | Freq C | Freq G | A=>T | A=>C | A=>G | T=>A | T=>C | T=>G | C=>A | C=>T | C=>G | G=>A | G=>T | G=>C |
|----------|--------|----------|--------|--------|------|-------|------|--------|--------|--------|--------|------|------|------|------|------|------|------|------|------|------|------|------|
| T92+I    | 188    | 3624.7 * | 2182.3 | -900.9 | 0.45 | n/a   | 1.82 | 0.34   | 0.34   | 0.16   | 0.16   | 0.06 | 0.03 | 0.11 | 0.06 | 0.11 | 0.03 | 0.06 | 0.23 | 0.03 | 0.23 | 0.06 | 0.03 |
| T92+G    | 188    | 3630.9   | 2188.4 | -904.0 | n/a  | 0.56  | 1.91 | 0.34   | 0.34   | 0.16   | 0.16   | 0.05 | 0.02 | 0.11 | 0.05 | 0.11 | 0.02 | 0.05 | 0.24 | 0.02 | 0.24 | 0.05 | 0.02 |
| T92+G+I  | 189    | 3634.1   | 2184.0 | -900.8 | 0.42 | 6.52  | 1.85 | 0.34   | 0.34   | 0.16   | 0.16   | 0.05 | 0.02 | 0.11 | 0.05 | 0.11 | 0.02 | 0.05 | 0.23 | 0.02 | 0.23 | 0.05 | 0.02 |
| HKY+I    | 190    | 3639.4   | 2181.6 | -898.6 | 0.45 | n/a   | 1.82 | 0.37   | 0.32   | 0.13   | 0.18   | 0.05 | 0.02 | 0.12 | 0.06 | 0.09 | 0.03 | 0.06 | 0.22 | 0.03 | 0.25 | 0.05 | 0.02 |
| HKY+G    | 190    | 3641.5   | 2183.8 | -899.6 | n/a  | 0.55  | 1.90 | 0.37   | 0.32   | 0.13   | 0.18   | 0.05 | 0.02 | 0.13 | 0.06 | 0.09 | 0.03 | 0.06 | 0.22 | 0.03 | 0.25 | 0.05 | 0.02 |
| TN93+I   | 191    | 3646.8   | 2181.4 | -897.4 | 0.45 | n/a   | 1.88 | 0.37   | 0.32   | 0.13   | 0.18   | 0.05 | 0.02 | 0.15 | 0.06 | 0.07 | 0.03 | 0.06 | 0.17 | 0.03 | 0.29 | 0.05 | 0.02 |
| HKY+G+I  | 191    | 3648.8   | 2183.4 | -898.4 | 0.42 | 6.53  | 1.85 | 0.37   | 0.32   | 0.13   | 0.18   | 0.05 | 0.02 | 0.12 | 0.06 | 0.09 | 0.03 | 0.06 | 0.22 | 0.03 | 0.25 | 0.05 | 0.02 |
| TN93+G   | 191    | 3654.8   | 2189.4 | -901.4 | n/a  | 0.56  | 1.95 | 0.37   | 0.32   | 0.13   | 0.18   | 0.05 | 0.02 | 0.14 | 0.06 | 0.07 | 0.03 | 0.06 | 0.18 | 0.03 | 0.29 | 0.05 | 0.02 |
| T92      | 187    | 3655.8   | 2221.0 | -921.3 | n/a  | n/a   | 1.59 | 0.34   | 0.34   | 0.16   | 0.16   | 0.06 | 0.03 | 0.1  | 0.06 | 0.1  | 0.03 | 0.06 | 0.22 | 0.03 | 0.22 | 0.06 | 0.03 |
| TN93+G+I | 192    | 3656.5   | 2183.4 | -897.4 | 0.44 | 14.66 | 1.90 | 0.37   | 0.32   | 0.13   | 0.18   | 0.05 | 0.02 | 0.15 | 0.06 | 0.07 | 0.03 | 0.06 | 0.17 | 0.03 | 0.29 | 0.05 | 0.02 |
| K2+I     | 187    | 3662.7   | 2227.9 | -924.8 | 0.46 | n/a   | 1.69 | 0.25   | 0.25   | 0.25   | 0.25   | 0.05 | 0.05 | 0.16 | 0.05 | 0.16 | 0.05 | 0.05 | 0.16 | 0.05 | 0.16 | 0.05 | 0.05 |
| K2+G     | 187    | 3668.6   | 2233.8 | -927.7 | n/a  | 0.59  | 1.73 | 0.25   | 0.25   | 0.25   | 0.25   | 0.05 | 0.05 | 0.16 | 0.05 | 0.16 | 0.05 | 0.05 | 0.16 | 0.05 | 0.16 | 0.05 | 0.05 |
| GTR+I    | 194    | 3670.5   | 2182.2 | -894.7 | 0.44 | n/a   | 1.73 | 0.37   | 0.32   | 0.13   | 0.18   | 0.04 | 0.04 | 0.13 | 0.04 | 0.07 | 0.03 | 0.11 | 0.17 | 0.03 | 0.27 | 0.05 | 0.02 |
| HKY      | 189    | 3670.6   | 2220.5 | -919.0 | n/a  | n/a   | 1.58 | 0.37   | 0.32   | 0.13   | 0.18   | 0.06 | 0.02 | 0.12 | 0.07 | 0.08 | 0.03 | 0.07 | 0.21 | 0.03 | 0.24 | 0.06 | 0.02 |
| K2+G+I   | 188    | 3670.6   | 2228.2 | -923.9 | 0.45 | 39.53 | 1.69 | 0.25   | 0.25   | 0.25   | 0.25   | 0.05 | 0.05 | 0.16 | 0.05 | 0.16 | 0.05 | 0.05 | 0.16 | 0.05 | 0.16 | 0.05 | 0.05 |
| GTR+G    | 194    | 3672.4   | 2184.1 | -895.7 | n/a  | 0.55  | 1.82 | 0.37   | 0.32   | 0.13   | 0.18   | 0.03 | 0.04 | 0.13 | 0.04 | 0.08 | 0.03 | 0.12 | 0.19 | 0.03 | 0.25 | 0.05 | 0.02 |
| GTR+G+I  | 195    | 3679.1   | 2183.1 | -894.2 | 0.42 | 6.84  | 1.81 | 0.37   | 0.32   | 0.13   | 0.18   | 0.03 | 0.04 | 0.14 | 0.04 | 0.07 | 0.03 | 0.11 | 0.18 | 0.03 | 0.27 | 0.05 | 0.02 |
| TN93     | 190    | 3681.7   | 2223.9 | -919.7 | n/a  | n/a   | 1.58 | 0.37   | 0.32   | 0.13   | 0.18   | 0.06 | 0.02 | 0.13 | 0.07 | 0.08 | 0.03 | 0.07 | 0.19 | 0.03 | 0.25 | 0.06 | 0.02 |
| K2       | 186    | 3690.5   | 2263.3 | -943.5 | n/a  | n/a   | 1.53 | 0.25   | 0.25   | 0.25   | 0.25   | 0.05 | 0.05 | 0.15 | 0.05 | 0.15 | 0.05 | 0.05 | 0.15 | 0.05 | 0.15 | 0.05 | 0.05 |
| JC+I     | 186    | 3692.7   | 2265.6 | -944.6 | 0.45 | n/a   | 0.5  | 0.25   | 0.25   | 0.25   | 0.25   | 0.08 | 0.08 | 0.08 | 0.08 | 0.08 | 0.08 | 0.08 | 0.08 | 0.08 | 0.08 | 0.08 | 0.08 |
| JC+G     | 186    | 3696.8   | 2269.7 | -946.7 | n/a  | 0.64  | 0.5  | 0.25   | 0.25   | 0.25   | 0.25   | 0.08 | 0.08 | 0.08 | 0.08 | 0.08 | 0.08 | 0.08 | 0.08 | 0.08 | 0.08 | 0.08 | 0.08 |
| JC+G+I   | 187    | 3702.4   | 2267.6 | -944.6 | 0.45 | 200   | 0.5  | 0.25   | 0.25   | 0.25   | 0.25   | 0.08 | 0.08 | 0.08 | 0.08 | 0.08 | 0.08 | 0.08 | 0.08 | 0.08 | 0.08 | 0.08 | 0.08 |
| GTR      | 193    | 3703.2   | 2222.5 | -915.9 | n/a  | n/a   | 1.48 | 0.37   | 0.32   | 0.13   | 0.18   | 0.05 | 0.04 | 0.12 | 0.05 | 0.07 | 0.03 | 0.12 | 0.19 | 0.03 | 0.23 | 0.05 | 0.02 |

|    |     |        |        |        |     |     |     |      |      |      |      |      |      |      |      |      |      |      |      |      |      |      |
|----|-----|--------|--------|--------|-----|-----|-----|------|------|------|------|------|------|------|------|------|------|------|------|------|------|------|
| JC | 185 | 3719.4 | 2299.9 | -962.8 | n/a | n/a | 0.5 | 0.25 | 0.25 | 0.25 | 0.25 | 0.08 | 0.08 | 0.08 | 0.08 | 0.08 | 0.08 | 0.08 | 0.08 | 0.08 | 0.08 | 0.08 |
|----|-----|--------|--------|--------|-----|-----|-----|------|------|------|------|------|------|------|------|------|------|------|------|------|------|------|

\* Models with the lowest BIC scores (Bayesian Information Criterion) are considered to describe the substitution pattern the best. For each model, AICc value (Akaike Information Criterion, corrected), Maximum Likelihood value (lnL), and the number of parameters (including branch lengths) are also presented [23]. Non-uniformity of evolutionary rates among sites may be modeled by using a discrete Gamma distribution (+G) with 5 rate categories and by assuming that a certain fraction of sites are evolutionarily invariable (+I). Whenever applicable, estimates of gamma shape parameter and/or the estimated fraction of invariant sites are shown. They are followed by nucleotide frequencies (f) and rates of base substitutions (r) for each nucleotide pair. Relative values of instantaneous r should be considered when evaluating them. For simplicity, sum of r values is made equal to 1 for each model. For estimating ML values, a tree topology was automatically computed using MEGA X [22]. This analysis involved 67 nucleotide sequences. Codon positions included were 1st+2nd+3rd+Noncoding.

Abbreviations: TR: General Time Reversible; HKY: Hasegawa-Kishino-Yano; TN93: Tamura-Nei; T92: Tamura 3-parameter; K2: Kimura 2-parameter; JC: Jukes-Cantor

**Table S4. Estimates of Evolutionary Divergence between Sequences of *C. tritaeniorhynchus*.**

| Species 1                                    | Species 2                                   | Evolutionary distance | Geographical location |
|----------------------------------------------|---------------------------------------------|-----------------------|-----------------------|
| <b><i>C. tritaeniorhynchus</i>/2B64-9.20</b> | <b><i>C. tritaeniorhynchus</i>/MBIM1-A3</b> | <b>0.00464026</b>     | <b>Turkey</b>         |
| <i>C. tritaeniorhynchus</i> /2B64-9.20       | <i>C. tritaeniorhynchus</i> /MBIM1-A7       | 0.00776174            | Turkey                |
| <i>C. tritaeniorhynchus</i> /2B64-9.20       | <i>C. tritaeniorhynchus</i> /MBIM1-A5       | 0.00933086            | Turkey                |
| <i>C. tritaeniorhynchus</i> /2B64-9.20       | <i>C. tritaeniorhynchus</i> /SYYK-5         | 0.00933140            | China                 |
| <i>C. tritaeniorhynchus</i> /2B64-9.20       | <i>C. tritaeniorhynchus</i> /YZFS-14        | 0.01088612            | China                 |
| <i>C. tritaeniorhynchus</i> /2B64-9.20       | <i>C. tritaeniorhynchus</i> /SXAK-2         | 0.01090597            | China                 |
| <i>C. tritaeniorhynchus</i> /2B64-9.20       | <i>C. tritaeniorhynchus</i> /BJMJ-5         | 0.01090597            | China                 |
| <i>C. tritaeniorhynchus</i> /2B64-9.20       | <i>C. tritaeniorhynchus</i> /544IRI2011     | 0.01090634            | Japan                 |
| <i>C. tritaeniorhynchus</i> /2B64-9.20       | <i>C. tritaeniorhynchus</i> /YZFS-5         | 0.01090634            | China                 |
| <i>C. tritaeniorhynchus</i> /2B64-9.20       | <i>C. tritaeniorhynchus</i> /SCYA-16        | 0.01090634            | China                 |
| <i>C. tritaeniorhynchus</i> /2B64-9.20       | <i>C. tritaeniorhynchus</i> /SCNC-11        | 0.01090634            | China                 |
| <i>C. tritaeniorhynchus</i> /2B64-9.20       | <i>C. tritaeniorhynchus</i> /NX-9           | 0.01090634            | China                 |
| <i>C. tritaeniorhynchus</i> /2B64-9.20       | <i>C. tritaeniorhynchus</i> /LHWY-4         | 0.01090634            | China                 |
| <i>C. tritaeniorhynchus</i> /2B64-9.20       | <i>C. tritaeniorhynchus</i> /LHLW-1         | 0.01090634            | China                 |
| <i>C. tritaeniorhynchus</i> /2B64-9.20       | <i>C. tritaeniorhynchus</i> /GZYC-23        | 0.01090634            | China                 |
| <i>C. tritaeniorhynchus</i> /2B64-9.20       | <i>C. tritaeniorhynchus</i> /GXBH-18        | 0.01090634            | China                 |
| <i>C. tritaeniorhynchus</i> /2B64-9.20       | <i>C. tritaeniorhynchus</i> /GXBH-17        | 0.01090634            | China                 |
| <i>C. tritaeniorhynchus</i> /2B64-9.20       | <i>C. tritaeniorhynchus</i> /GSPL-16        | 0.01090634            | China                 |
| <i>C. tritaeniorhynchus</i> /2B64-9.20       | <i>C. tritaeniorhynchus</i> /FJND-8         | 0.01090634            | China                 |
| <i>C. tritaeniorhynchus</i> /2B64-9.20       | <i>C. tritaeniorhynchus</i> /BJMJ-3         | 0.01090634            | China                 |
| <i>C. tritaeniorhynchus</i> /2B64-9.20       | <i>C. tritaeniorhynchus</i> /ZJNB-5         | 0.01090672            | China                 |
| <i>C. tritaeniorhynchus</i> /2B64-9.20       | <i>C. tritaeniorhynchus</i> /SYPJ-19        | 0.01090672            | China                 |
| <i>C. tritaeniorhynchus</i> /2B64-9.20       | <i>C. tritaeniorhynchus</i> /ZJNB-3         | 0.01248697            | China                 |
| <i>C. tritaeniorhynchus</i> /2B64-9.20       | <i>C. tritaeniorhynchus</i> /ZJJH-4         | 0.01248697            | China                 |
| <i>C. tritaeniorhynchus</i> /2B64-9.20       | <i>C. tritaeniorhynchus</i> /ZJJH-2         | 0.01248697            | China                 |
| <i>C. tritaeniorhynchus</i> /2B64-9.20       | <i>C. tritaeniorhynchus</i> /ZJJH-23        | 0.01248697            | China                 |
| <i>C. tritaeniorhynchus</i> /2B64-9.20       | <i>C. tritaeniorhynchus</i> /ZJJH-13        | 0.01248697            | China                 |
| <i>C. tritaeniorhynchus</i> /2B64-9.20       | <i>C. tritaeniorhynchus</i> /YZFS-9         | 0.01248697            | China                 |
| <i>C. tritaeniorhynchus</i> /2B64-9.20       | <i>C. tritaeniorhynchus</i> /YZFS-3         | 0.01248697            | China                 |
| <i>C. tritaeniorhynchus</i> /2B64-9.20       | <i>C. tritaeniorhynchus</i> /YNRL-21        | 0.01248697            | China                 |
| <i>C. tritaeniorhynchus</i> /2B64-9.20       | <i>C. tritaeniorhynchus</i> /YNRL-15        | 0.01248697            | China                 |
| <i>C. tritaeniorhynchus</i> /2B64-9.20       | <i>C. tritaeniorhynchus</i> /SYYK-1         | 0.01248697            | China                 |
| <i>C. tritaeniorhynchus</i> /2B64-9.20       | <i>C. tritaeniorhynchus</i> /SYYK-11        | 0.01248697            | China                 |
| <i>C. tritaeniorhynchus</i> /2B64-9.20       | <i>C. tritaeniorhynchus</i> /SYPJ-8         | 0.01248697            | China                 |
| <i>C. tritaeniorhynchus</i> /2B64-9.20       | <i>C. tritaeniorhynchus</i> /SYPJ-3         | 0.01248697            | China                 |
| <i>C. tritaeniorhynchus</i> /2B64-9.20       | <i>C. tritaeniorhynchus</i> /SYPJ-22        | 0.01248697            | China                 |
| <i>C. tritaeniorhynchus</i> /2B64-9.20       | <i>C. tritaeniorhynchus</i> /SYPJ-13        | 0.01248697            | China                 |

|                                        |                                      |            |       |
|----------------------------------------|--------------------------------------|------------|-------|
| <i>C. tritaeniorhynchus</i> /2B64-9.20 | <i>C. tritaeniorhynchus</i> /SYJZ-7  | 0.01248697 | China |
| <i>C. tritaeniorhynchus</i> /2B64-9.20 | <i>C. tritaeniorhynchus</i> /SYJZ-2  | 0.01248697 | China |
| <i>C. tritaeniorhynchus</i> /2B64-9.20 | <i>C. tritaeniorhynchus</i> /SYJZ-19 | 0.01248697 | China |
| <i>C. tritaeniorhynchus</i> /2B64-9.20 | <i>C. tritaeniorhynchus</i> /SYDD-8  | 0.01248697 | China |
| <i>C. tritaeniorhynchus</i> /2B64-9.20 | <i>C. tritaeniorhynchus</i> /SXAK-13 | 0.01248697 | China |
| <i>C. tritaeniorhynchus</i> /2B64-9.20 | <i>C. tritaeniorhynchus</i> /SXAK-6  | 0.01248697 | China |
| <i>C. tritaeniorhynchus</i> /2B64-9.20 | <i>C. tritaeniorhynchus</i> /SHJD-4  | 0.01248697 | China |
| <i>C. tritaeniorhynchus</i> /2B64-9.20 | <i>C. tritaeniorhynchus</i> /SHBS-20 | 0.01248697 | China |
| <i>C. tritaeniorhynchus</i> /2B64-9.20 | <i>C. tritaeniorhynchus</i> /SCYA-13 | 0.01248697 | China |
| <i>C. tritaeniorhynchus</i> /2B64-9.20 | <i>C. tritaeniorhynchus</i> /SCYA-6  | 0.01248697 | China |
| <i>C. tritaeniorhynchus</i> /2B64-9.20 | <i>C. tritaeniorhynchus</i> /SCYA-3  | 0.01248697 | China |
| <i>C. tritaeniorhynchus</i> /2B64-9.20 | <i>C. tritaeniorhynchus</i> /SCYA-1  | 0.01248697 | China |
| <i>C. tritaeniorhynchus</i> /2B64-9.20 | <i>C. tritaeniorhynchus</i> /SCCD-30 | 0.01248697 | China |
| <i>C. tritaeniorhynchus</i> /2B64-9.20 | <i>C. tritaeniorhynchus</i> /SCCD-31 | 0.01248697 | China |
| <i>C. tritaeniorhynchus</i> /2B64-9.20 | <i>C. tritaeniorhynchus</i> /NX-8    | 0.01248697 | China |
| <i>C. tritaeniorhynchus</i> /2B64-9.20 | <i>C. tritaeniorhynchus</i> /NX-7    | 0.01248697 | China |
| <i>C. tritaeniorhynchus</i> /2B64-9.20 | <i>C. tritaeniorhynchus</i> /NX-5    | 0.01248697 | China |
| <i>C. tritaeniorhynchus</i> /2B64-9.20 | <i>C. tritaeniorhynchus</i> /LHLW-16 | 0.01248697 | China |
| <i>C. tritaeniorhynchus</i> /2B64-9.20 | <i>C. tritaeniorhynchus</i> /LHLW-14 | 0.01248697 | China |
| <i>C. tritaeniorhynchus</i> /2B64-9.20 | <i>C. tritaeniorhynchus</i> /LHLW-4  | 0.01248697 | China |
| <i>C. tritaeniorhynchus</i> /2B64-9.20 | <i>C. tritaeniorhynchus</i> /LHJS-14 | 0.01248697 | China |
| <i>C. tritaeniorhynchus</i> /2B64-9.20 | <i>C. tritaeniorhynchus</i> /LHJS-12 | 0.01248697 | China |
| <i>C. tritaeniorhynchus</i> /2B64-9.20 | <i>C. tritaeniorhynchus</i> /JXNC-17 | 0.01248697 | China |
| <i>C. tritaeniorhynchus</i> /2B64-9.20 | <i>C. tritaeniorhynchus</i> /JSWX-25 | 0.01248697 | China |
| <i>C. tritaeniorhynchus</i> /2B64-9.20 | <i>C. tritaeniorhynchus</i> /JSWX-23 | 0.01248697 | China |
| <i>C. tritaeniorhynchus</i> /2B64-9.20 | <i>C. tritaeniorhynchus</i> /HNCS-41 | 0.01248697 | China |
| <i>C. tritaeniorhynchus</i> /2B64-9.20 | <i>C. tritaeniorhynchus</i> /HNCS-33 | 0.01248697 | China |
| <i>C. tritaeniorhynchus</i> /2B64-9.20 | <i>C. tritaeniorhynchus</i> /HNCS-28 | 0.01248697 | China |
| <i>C. tritaeniorhynchus</i> /2B64-9.20 | <i>C. tritaeniorhynchus</i> /HNCS-25 | 0.01248697 | China |

The number of base substitutions per site from between sequences are shown. Analyses were conducted using the Tamura 3-parameter model [24]. This analysis involved 67 nucleotide sequences. Codon positions included were 1st+2nd+3rd+Noncoding. All ambiguous positions were removed for each sequence pair (pairwise deletion option). Evolutionary analyses were conducted in MEGA X [22].
